# Supplementary material for: Argonaute2 attenuates active transcription by limiting RNA Polymerase II elongation in Drosophila melanogaster
Source: PubMed Central journal article supplement (PMC6200757; doi:10.1038/s41598-018-34115-1), 2018-10-24
Supplement: 41598_2018_34115_MOESM1_ESM.pdf [file 41598_2018_34115_MOESM1_ESM.pdf]

**Supplementary Information for:**

**Argonaute2 attenuates active transcription by limiting RNA Polymerase II elongation in *Drosophila melanogaster***

Ezequiel Nazer<sup>1,2</sup>, Ryan K. Dale<sup>2</sup>, Cameron Palmer<sup>2</sup>, and Elissa P. Lei<sup>1,2\*</sup>

<sup>1</sup>Nuclear Organization and Gene Expression Section

<sup>2</sup>Laboratory of Cellular and Developmental Biology, National Institute of Diabetes and Digestive and Kidney Diseases, National Institutes of Health, 9000 Rockville Pike, Bethesda, MD 20892, USA

\*Correspondence: [leielissa@nidDK.nih.gov](mailto:leielissa@nidDK.nih.gov)

**Supplemental Figure Legends**

**Figure S1 (related to figure 1)**

- A. Validation by qRT-PCR for Triptolide transcription inhibition in Kc167 cells. Levels of *betaTub60D* pre-mRNA in triptolide-treated cells are relative to mock-treated cells and normalized to *U6* snRNA. Error bars correspond to 95% confidence interval of four experiments.
- B. Western blot analysis showing no changes either for total Pol II or AGO2 levels upon Triptolide treatment. Representative western blots (cropped) are shown.

**Figure S2 (related to figures 3, 4)**

Scatterplot comparing gain of Pol II 8WG16, S5, S2 or NELF-E peaks upon AGO2 knockdown and AGO2 ChRIP-seq peaks (red). Genes gaining the indicated factor at AGO2 ChRIP peaks are colored in orange. FET *p*-values and odds ratios indicate significance of the overlap between gain of the indicated factor peaks and AGO2 ChRIP-seq peaks.

### **Figure S3 (related to figures 3, 4)**

Scatterplot comparing gain of Pol II 8WG16, S5, S2 or NELF-E peaks upon AGO2 knockdown and neuRNA-seq AGO2-dependent genes (up=red, down=blue). Genes gaining the indicated factor at AGO2-dependent genes are colored in orange. FET  $p$ -values and odds ratios indicate significance of the overlap between gain of the indicated factor peaks and AGO2-inhibited genes.

### **Figure S4 (related to figure 3)**

- A. Differential ChIP-seq analysis for hypophosphorylated (8WG16) and elongating (S5 and S2) Pol II forms on neuRNA-seq affected genes upon depletion of LaminB. Size of circles indicates the number of total genes across the genome that display differential binding (see text for intersection values), and color indicates  $-\log_{10}(\text{FDR})$  where FDR is the  $p$ -value from FETs adjusted for multiple comparisons. Only statistically significant results are shown for clarity.
- B. Screenshot showing the example gene *Socs36E*, which is up-regulated in LaminB knockdown. AGO2 ChIP peaks (black bars) and ChIP-seq signal of hypophosphorylated, S5, and S2 forms of Pol II are shown. Red bars below signal tracks correspond to statistically significant increases in neuRNA-seq or ChIP-seq signal relative to mock sample.

### **Supplemental table legends**

**Table S1 (related to Materials and Methods). Antibodies used in this study**

**Table S2 (related to Materials and Methods). Oligos used in this study**

A

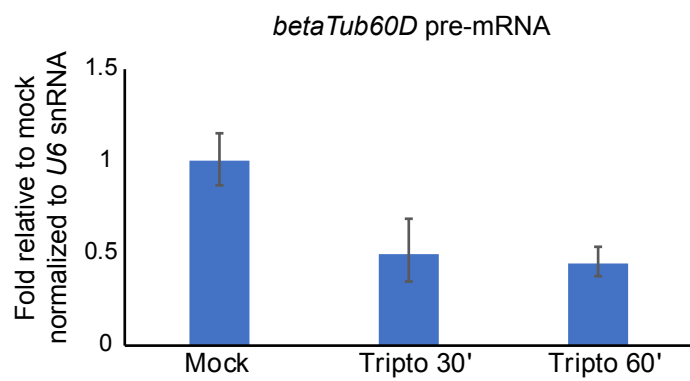

B

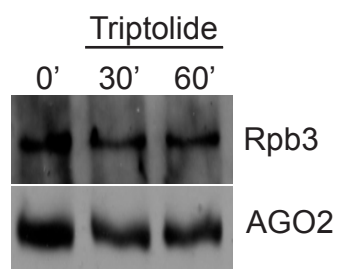

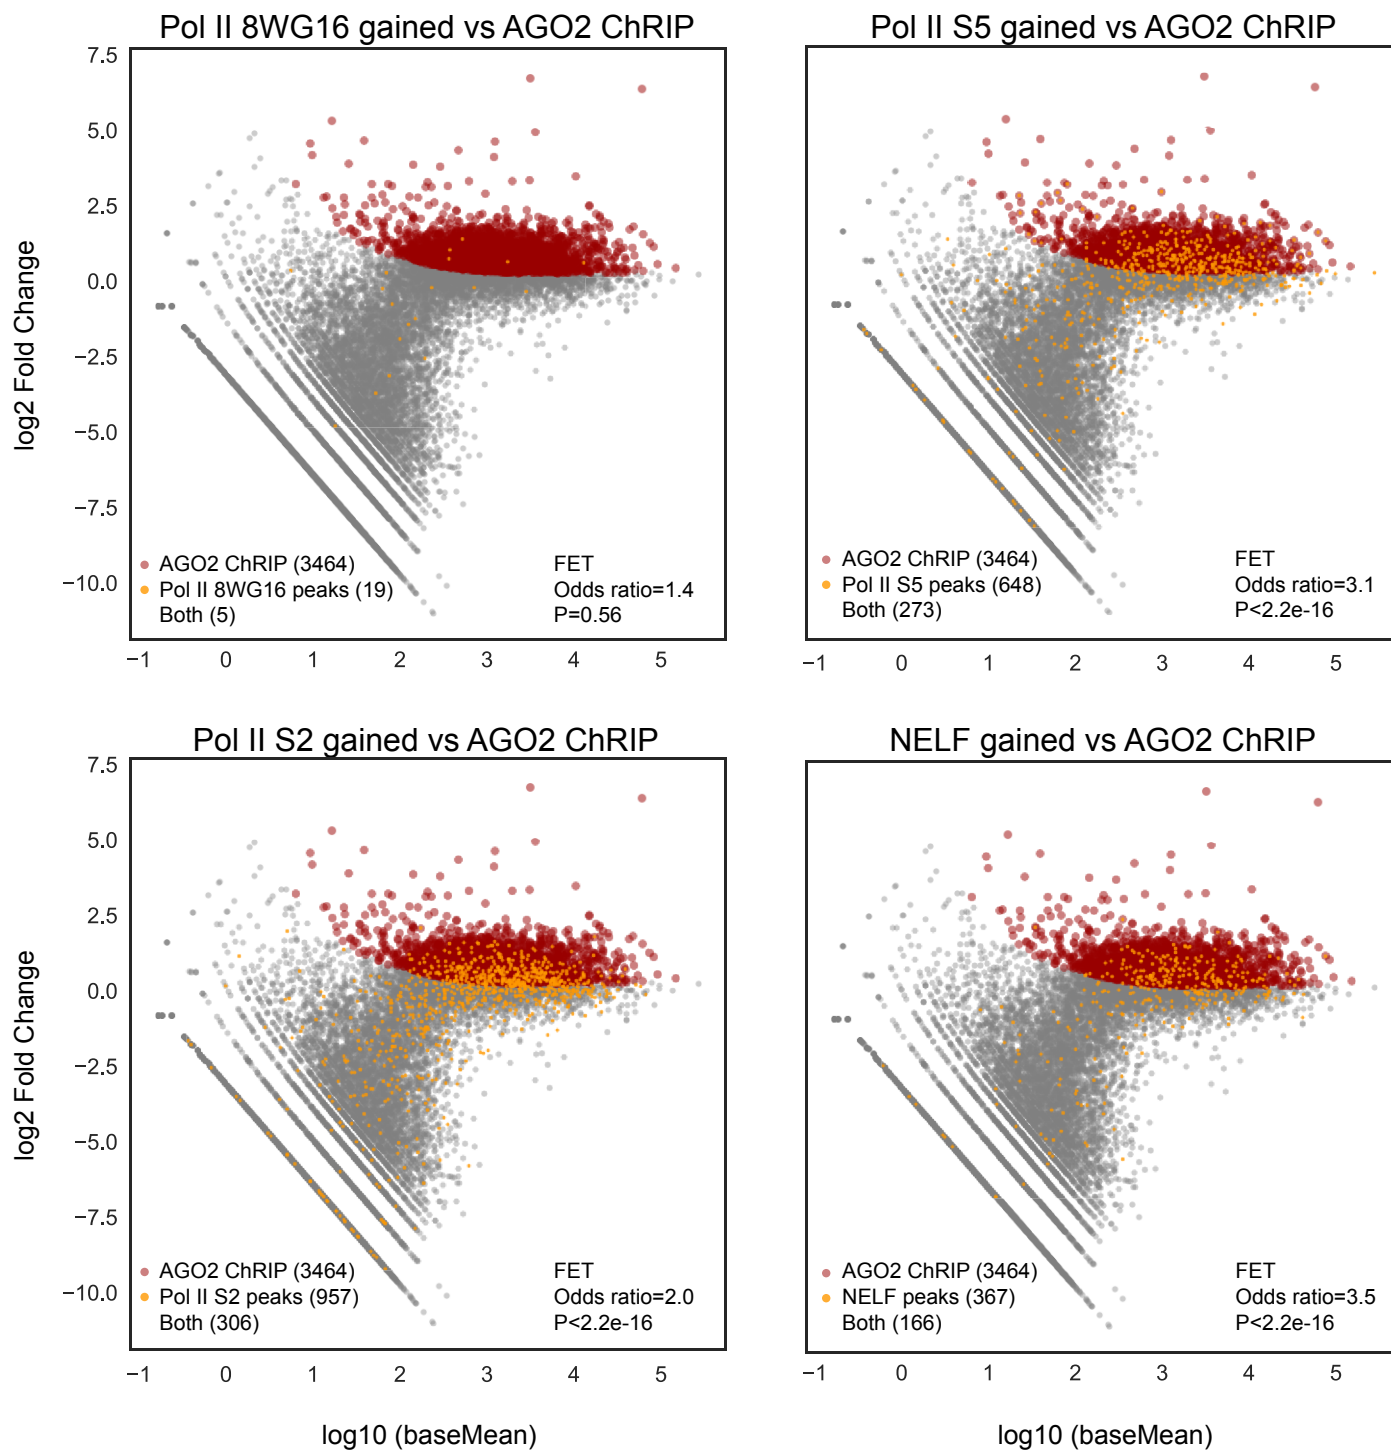

Pol II 8WG16 gained vs AGO2 KD neuRNA

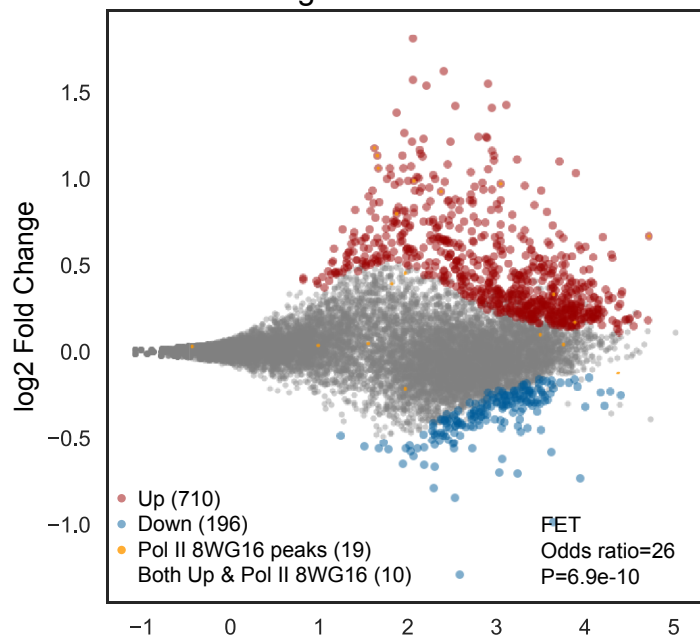

Pol II S5 gained vs AGO2 KD neuRNA

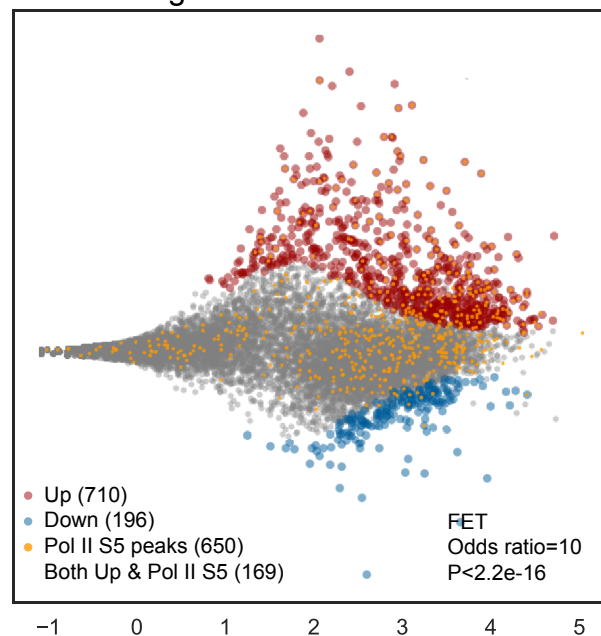

Pol II S2 gained vs AGO2 KD neuRNA

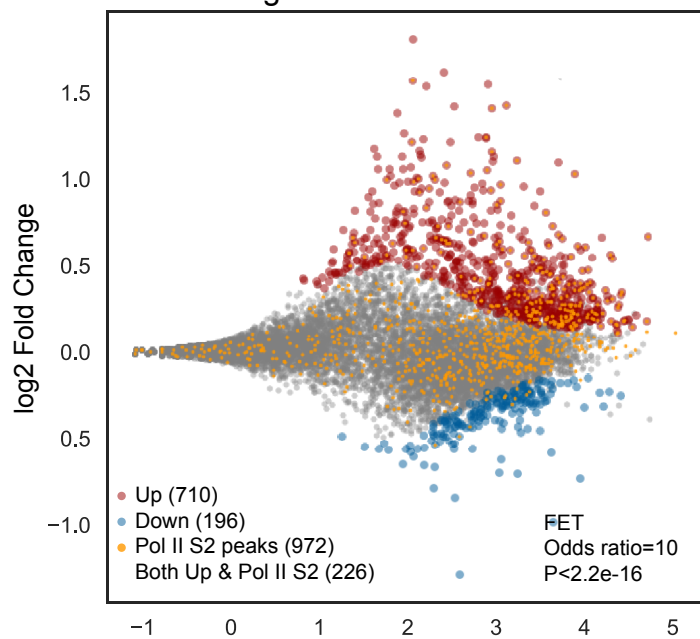

NELF gained vs AGO2 KD neuRNA

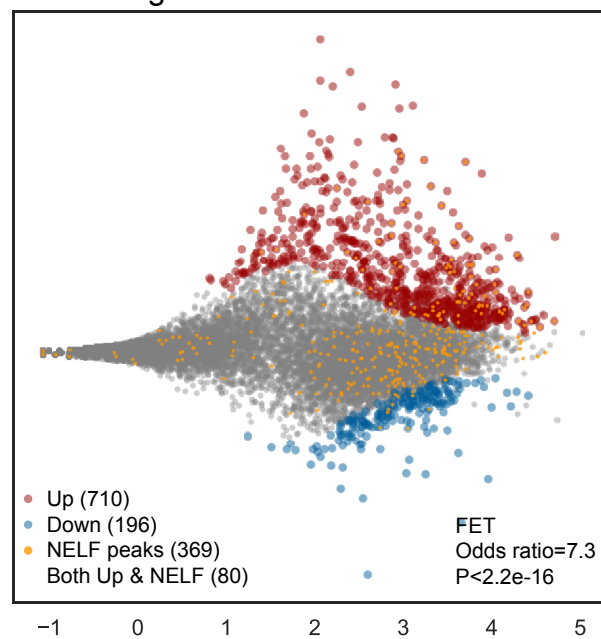log<sub>10</sub> (baseMean)log<sub>10</sub> (baseMean)

A

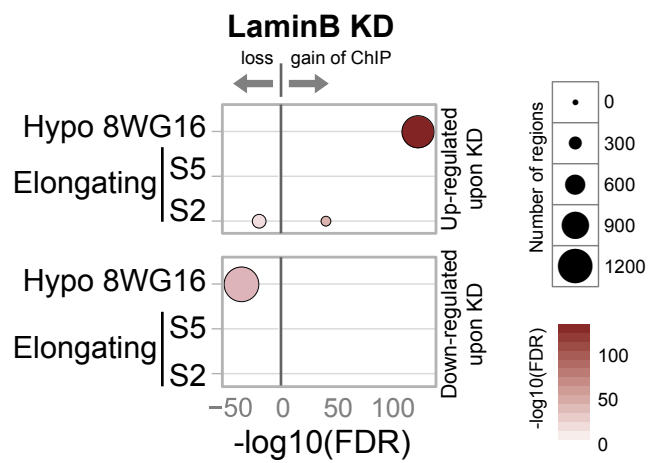

B

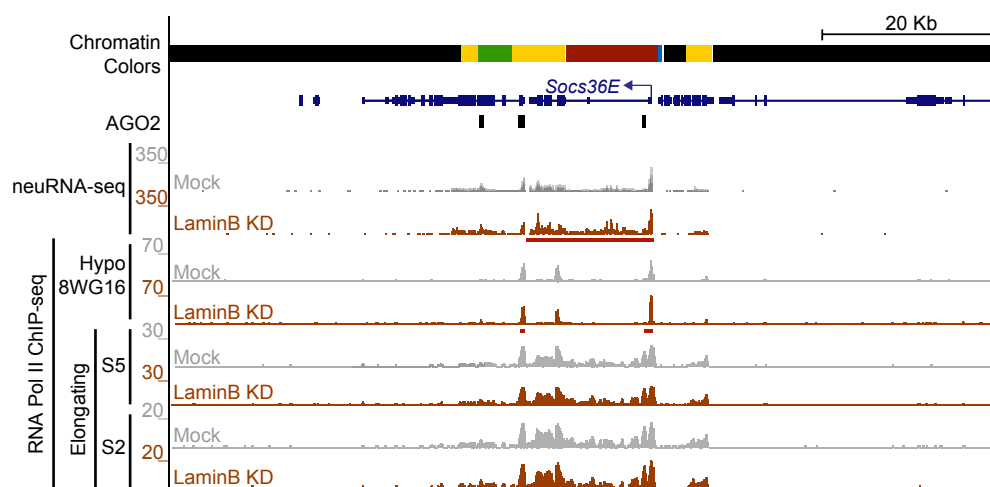

**Table S1 (related to Materials and Methods).** Antibodies used in this study

| Name             | Application  | Lab/company | Catalog |
|------------------|--------------|-------------|---------|
| AGO2 9D6         | ChIP-seq     | Siomi       | N/A     |
| AGO2 Mueller     | ChIP-seq     | Mueller     | N/A     |
| AGO2 Liu         | Wb           | Liu         | N/A     |
| CDK9             | ChIP-seq     | Nakamura    | N/A     |
| NELF-E           | ChIP-seq     | Gilmour     | N/A     |
| RNA Pol II Rpb3  | Wb           | Adelman     | N/A     |
| RNA Pol II 8WG16 | ChIP-seq; Wb | Biologend   | 920102  |
| RNA Pol II S5    | ChIP-seq; Wb | Abcam       | Ab5408  |
| RNA Pol II S2    | ChIP-seq; Wb | Abcam       | Ab5095  |
| HA               | IP           | Sigma       | H6908   |
| HA               | Wb           | Santa Cruz  | sc57592 |
| GAF              | Wb           | Cavalli     | N/A     |

Wb: western blot

IP: immunoprecipitation

**Table S2 (related to Materials and Methods). Oligos used in this study**

| Primer                | Gene    | Application             | Sequence                                     |
|-----------------------|---------|-------------------------|----------------------------------------------|
| siAGO2                | CG7439  | siRNA knockdowns        | CAACCACAGCAGCUGCAACdTdT                      |
| siAGO2                | CG7439  | siRNA knockdowns        | GUUGCAGCUGCUGUGGUUGdTdT                      |
| T7LaminB For          | CG6944  | dsRNA knockdowns        | TAATACGACTCACTATAGGGAGAGGAGAACACCATTTCAGAGTC |
| T7LaminB For          | CG6944  | dsRNA knockdowns        | TAATACGACTCACTATAGGGAGACCATAAGGTCCTGGTACTCC  |
| Fv_NELF_E_pentry      | CG5994  | Cloning in P-entry TOPO | caccATGGTTTACATACACTTCCCCAA                  |
| Rv_NELF_E_pentry      | CG5994  | Cloning in P-entry TOPO | CTAGAGCAAGAAGTCTTCATCGT                      |
| Fv_CDK9_pentry        | CG5179  | Cloning in P-entry TOPO | caccATGGCGCACATGTCCC                         |
| Rv_CDK9_pentry        | CG5179  | Cloning in P-entry TOPO | CTACCAAACCCGGTCAATCA                         |
| Fv_betatub60D_premRNA | CG3401  | qRT-PCR                 | AAATCGGCGCTAAGgtaggt                         |
| Rv_betatub60D_premRNA | CG3401  | qRT-PCR                 | cagccgatcatttggaaac                          |
| Fv_U6                 | CR31379 | qRT-PCR                 | GCTTCGGCAGAACATATACT                         |
| Rv_U6                 | CR31379 | qRT-PCR                 | AAAAATGTGGAACGCTTCAC                         |
